# Supplementary material for: Phase transition thermochromism based on C–H acidity of 4-alkylflavylium compounds in Pluronic F-127
Source: Royal Society of Chemistry journal article supplement (doi:10.1039/c1jm13348a), 2011-01-01
Supplement: c1jm13348a.pdf [file c1jm13348a.pdf]

## SUPPLEMENTARY INFORMATION

### Phase Transition Thermochemistry Based on C-H Acidity of 4-Alkylflavylium Compounds in Pluronic® F-127

João Avó,<sup>a</sup> A. Jorge Parola,<sup>a,\*</sup> João C. Lima,<sup>a</sup> Fernando Pina,<sup>a,\*</sup> Luís Cunha-Silva<sup>b</sup>

<sup>a</sup>REQUIMTE, Departamento de Química, Faculdade de Ciências e Tecnologia, Universidade Nova de Lisboa, 2829-516 Caparica, Portugal, Fax: +351212948550; Tel: +351212948355;

E-mail:ajp@dq.fct.unl.pt; E-mail: fjp@dq.fct.unl.pt

<sup>b</sup>REQUIMTE, Departamento de Química e Bioquímica, Faculdade de Ciências, Universidade do Porto, 4169-007 Porto, Portugal

|                                                                                                                                                                                |    |
|--------------------------------------------------------------------------------------------------------------------------------------------------------------------------------|----|
| 1. Crystal packing of the flavylium salt <b>5b</b> and the C–H···O hydrogen bonds                                                                                              | S2 |
| 2. UV-Vis spectra of ethylenic bases                                                                                                                                           | S3 |
| <b>6a</b> (Fig. S2)                                                                                                                                                            | S3 |
| <b>6b</b> (Fig. S2)                                                                                                                                                            | S3 |
| 3. <sup>1</sup> H NMR spectra of <b>5a</b> and <b>5b</b> in CDCl <sub>3</sub> and in D <sub>2</sub> O/CD <sub>3</sub> OD (1:1) at pH≈4 and of <b>6b</b> in CDCl <sub>3</sub> . | S4 |
| <b>5a</b> (Fig. S3 and S4)                                                                                                                                                     | S4 |
| <b>5b</b> (Fig. S5 and S6)                                                                                                                                                     | S5 |
| <b>6b</b> (Fig. S7)                                                                                                                                                            | S6 |
| 4. Titration of compounds <b>1</b> and <b>5a</b> in aqueous 20% (w/v) Pluronic® F127                                                                                           | S7 |
| <b>1</b> (Fig. S8)                                                                                                                                                             | S7 |
| <b>5a</b> (Fig. S9)                                                                                                                                                            | S7 |

## 1. Crystal packing of the flavylim salt **5b** and the C–H···O hydrogen bonds

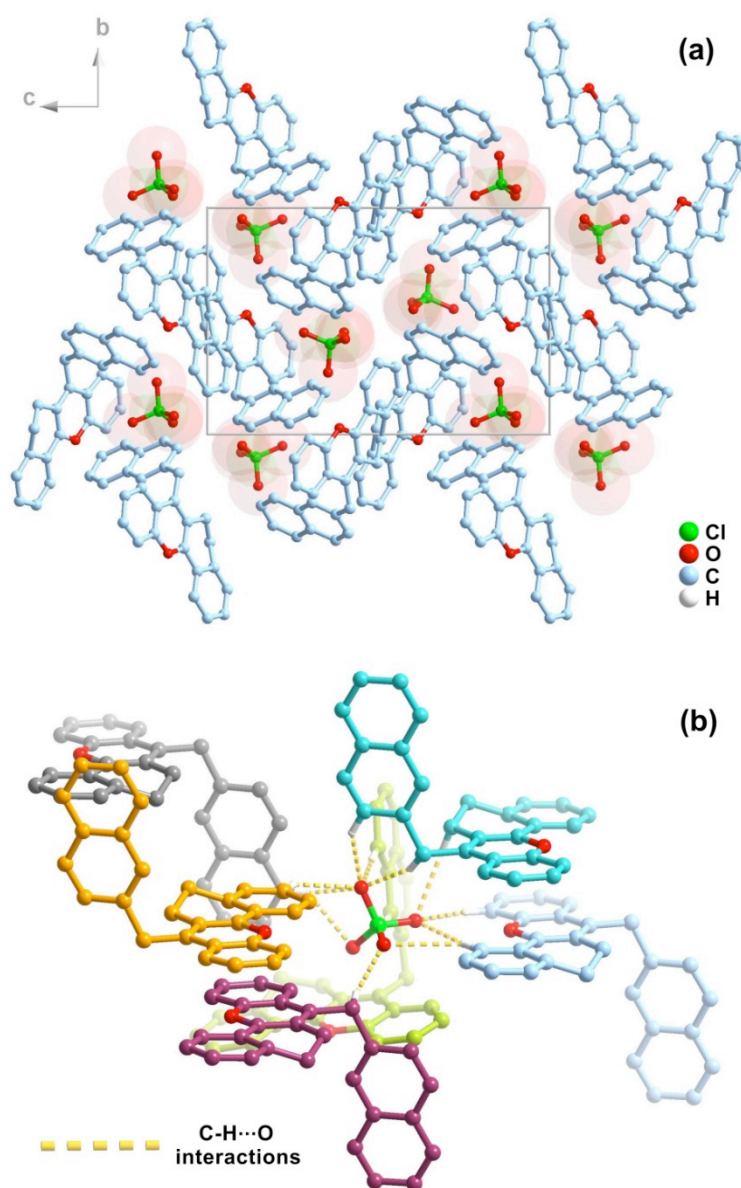

**Fig. S1** – a) Crystalline packing arrangement of the compound **5b** viewed in the [1 0 0] direction of the unit cell. b) Weak C–H···O hydrogen bond interactions (shown as golden dashed lines) between the perchlorate anion and the neighboring flavylum molecules; for clarity purpose the carbon atoms of distinct organic molecules are drawn in different colors.

## 2. UV-Vis spectra of ethylenic bases

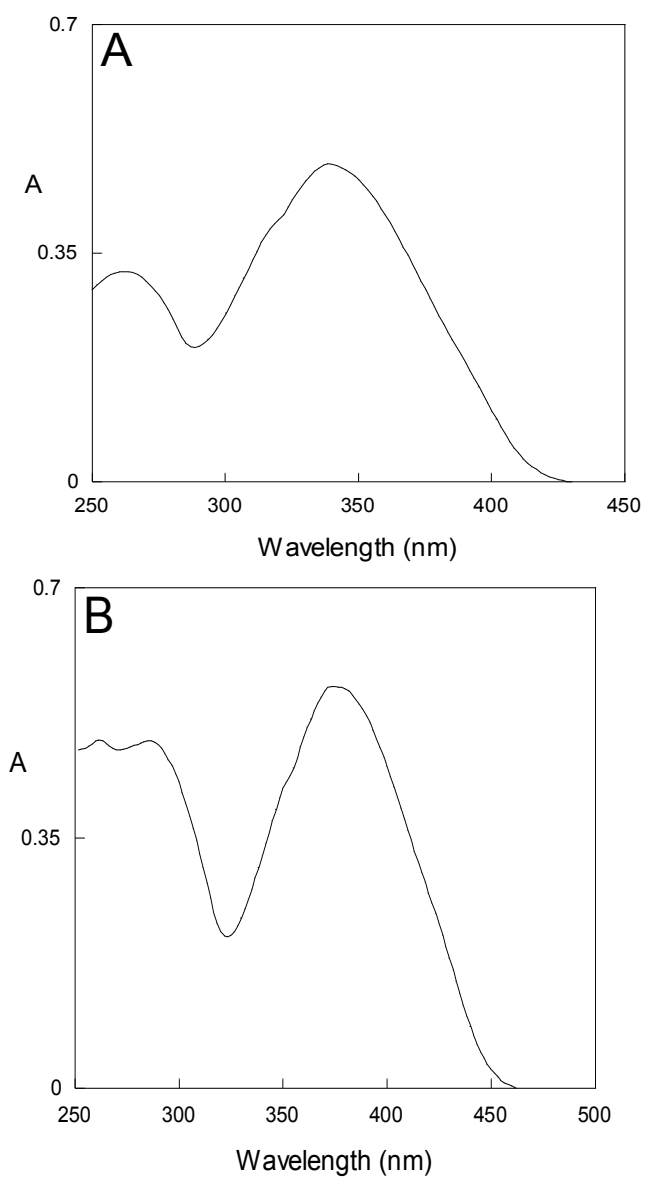

**Fig. S2** – UV-Vis spectra of ethylenic base solutions in chloroform:  
A.  $[6a]=1.3\times 10^{-5}$  M; B.  $[6b]=2.0\times 10^{-5}$  M

3.  $^1\text{H}$  NMR spectra of 5a and 5b in  $\text{CDCl}_3$  and in  $\text{D}_2\text{O}/\text{CD}_3\text{OD}$  (1:1) at  $\text{pH}\approx 4$ , and of 6b in  $\text{CDCl}_3$ .

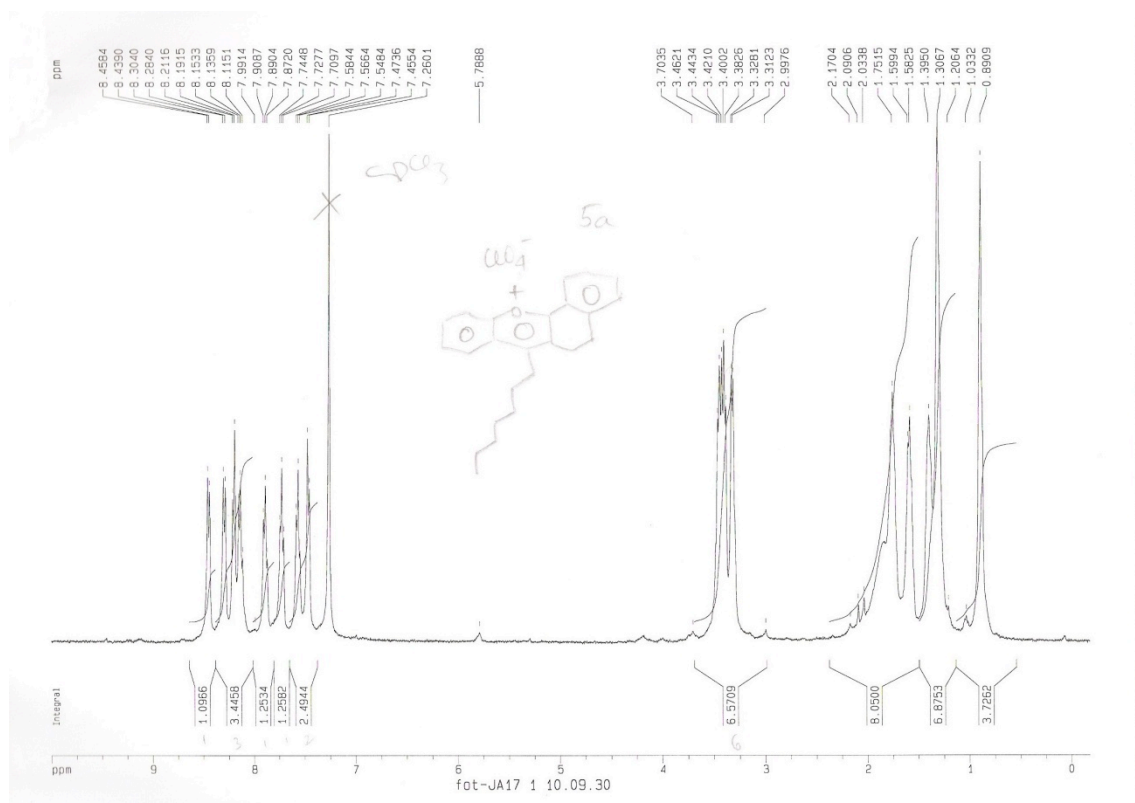

Fig. S3 –  $^1\text{H}$  NMR spectrum of 5a in  $\text{CDCl}_3$ .

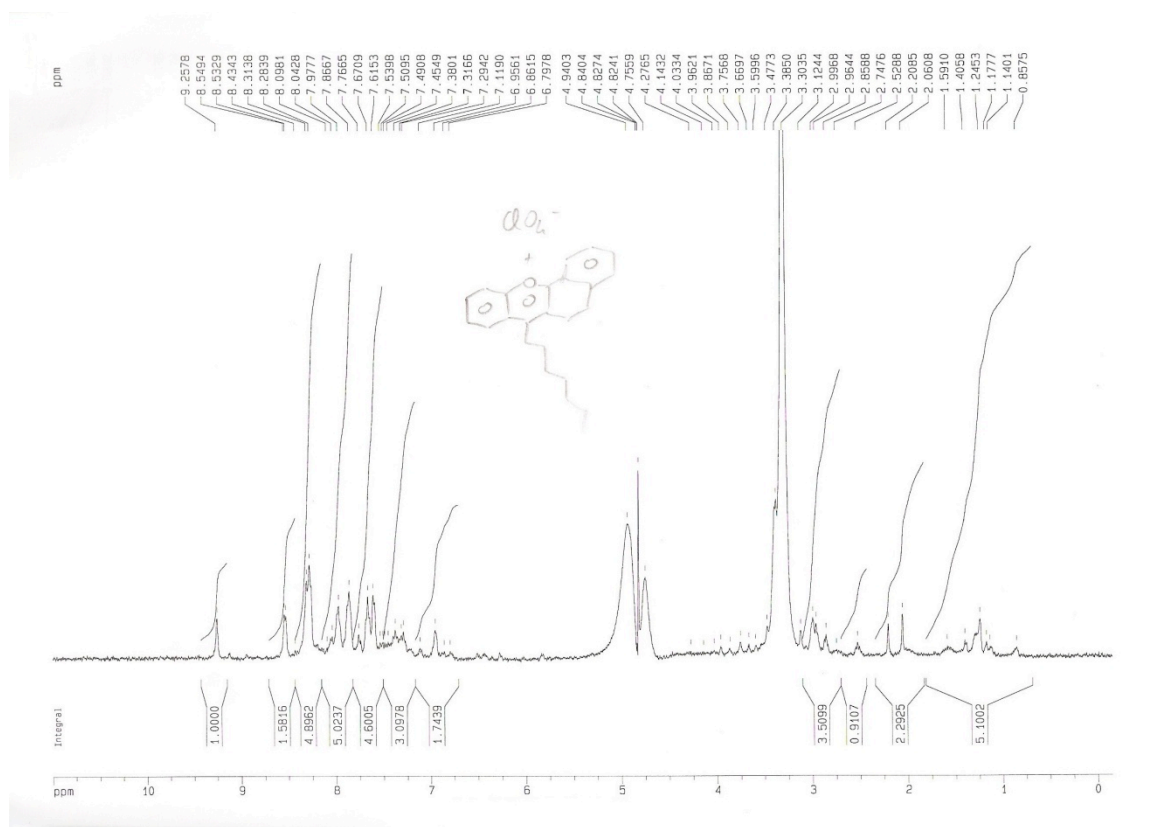

Fig. S4 –  $^1\text{H}$  NMR spectrum of 5a in  $\text{D}_2\text{O}/\text{CD}_3\text{OD}$  (1:1) at  $\text{pH}\approx 4$ .

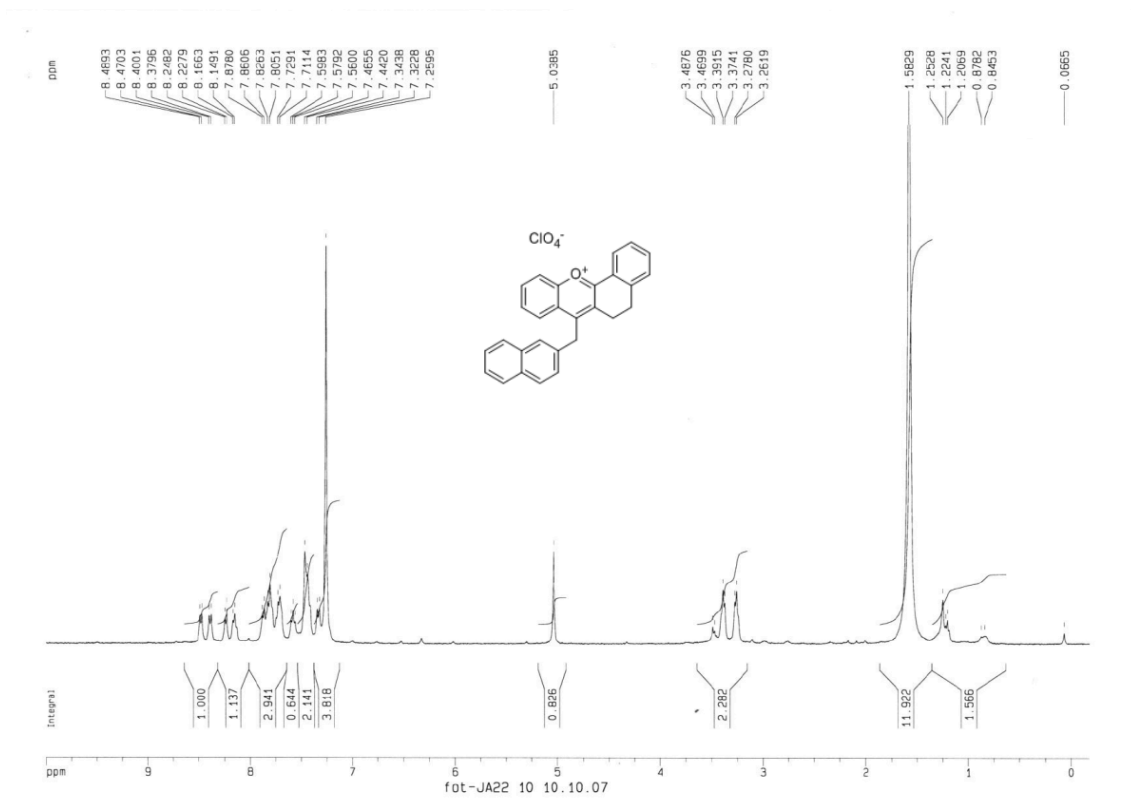

Fig. S5 –  $^1\text{H}$  NMR spectrum of **5b** in  $\text{CDCl}_3$ .

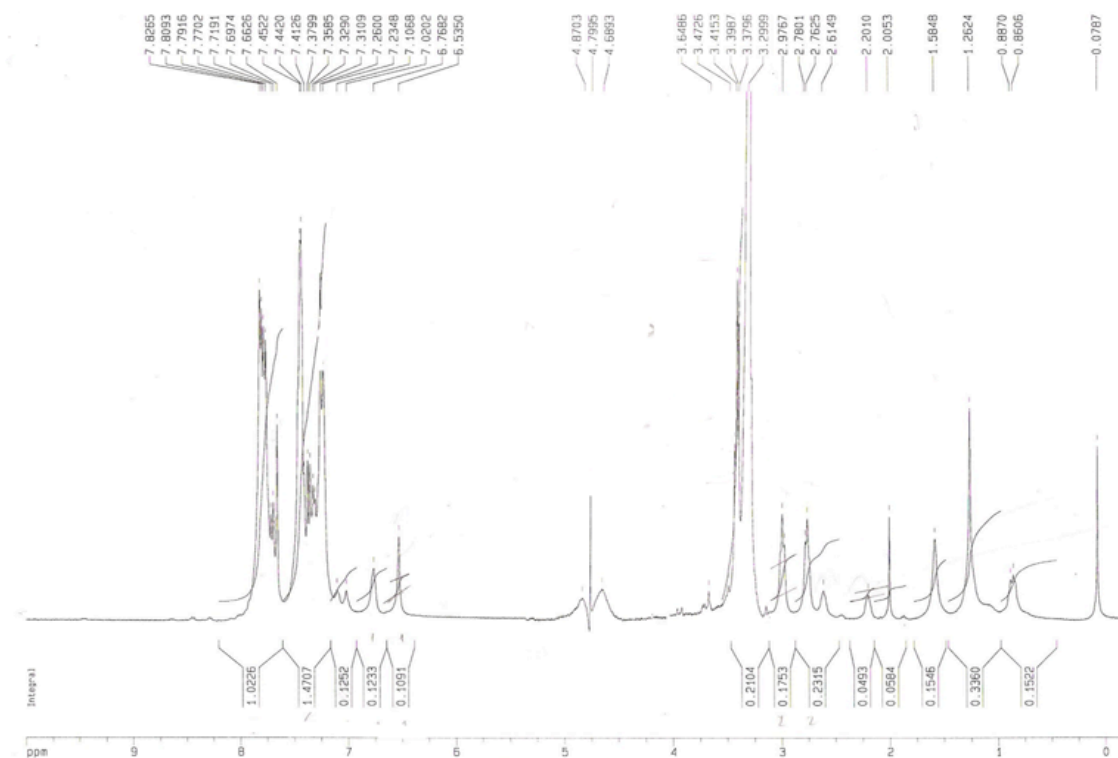

Fig. S6 –  $^1\text{H}$  NMR spectrum of **5b** in  $\text{D}_2\text{O}/\text{CD}_3\text{OD}$  (1:1) at  $\text{pH} \approx 4$ .

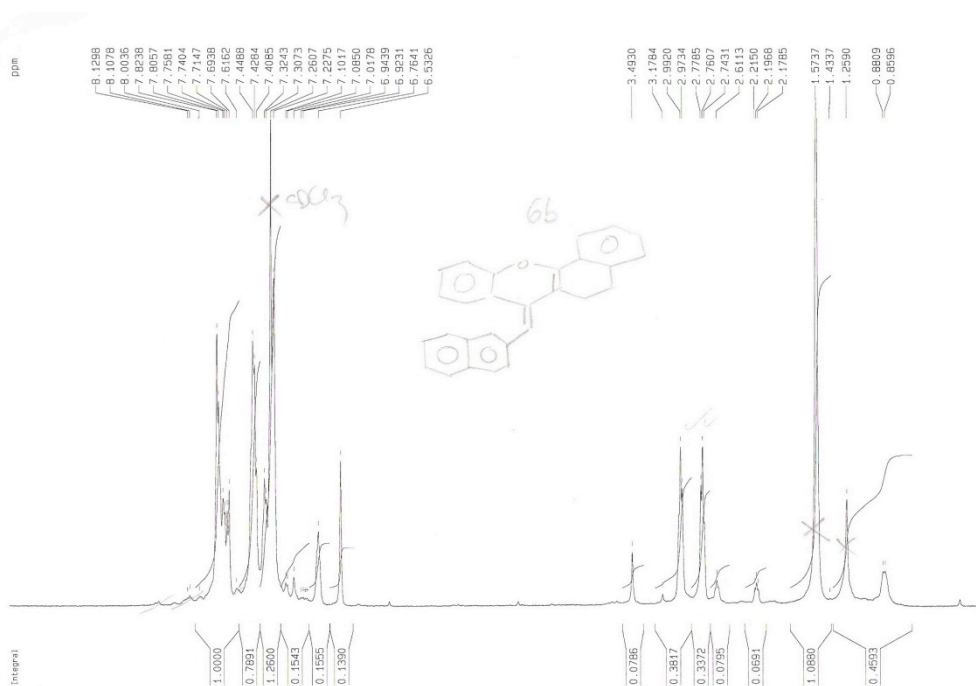

Fig. S7 –  $^1\text{H}$  NMR spectrum of **6b** in  $\text{CDCl}_3$ .

#### 4. Titration of compounds **1** and **5a** in aqueous 20% (w/v) Pluronic® F127

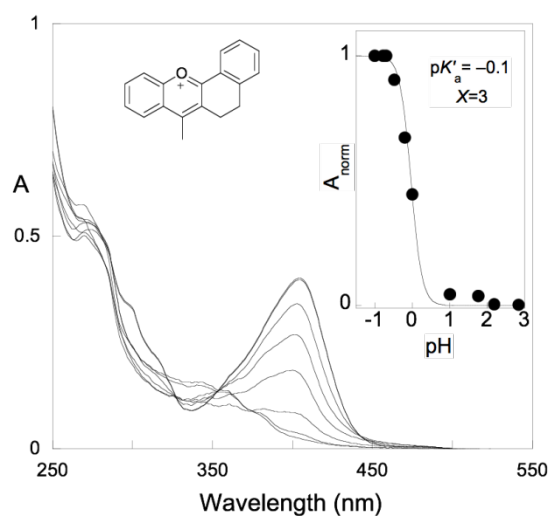

**Fig. S8** – Absorption spectra of compound **1**  $1.2 \times 10^{-4}$  M in the presence of 20% (w/v) Pluronic® micelles at room temperature. Fitting of the absorbance according to eq. (9).

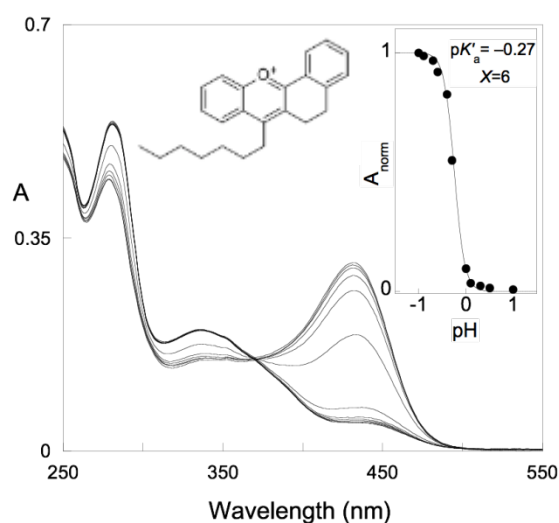

**Fig. S9** – Absorption spectra of compound **5a**  $2.3 \times 10^{-5}$  M in the presence of 20% (w/v) Pluronic® micelles at room temperature. Fitting of the absorbance according to eq. (9).
